# Supplementary material
Source: PubMed Central journal article supplement (PMC1690973)
Supplement: 12028780s01.pdf [file 12028780s01.pdf]

# ELECTRONIC APPENDIX

This is the Electronic Appendix to the article

**Coevolving avian eye size and brain size in relation to prey capture and nocturnality**

by

**László Zsolt Garamszegi, Anders Pape Møller and Johannes Erritzøe**

*Proc. R. Soc. B* **269**, 961–967 (doi:10.1098/rspb.2002.1967)

Electronic appendices are refereed with the text; however, no attempt is made to impose a uniform editorial style on the electronic appendices.

## ELECTRONIC APPENDIX A

**Erratum:** This database has been corrected on 12/8/04 for eye size. This correction does not affect any results of the corresponding paper.

Eye size (volumes in cm<sup>3</sup>), brain size (g) and body mass (g), prey capture technique, nocturnality and water related feeding of birds. See Methods for definitions. Values are means, s.e., sample size.

| Species                        | Eye size (cm <sup>3</sup> ) |       |    | Brain size (g) |       |    | Body mass (g) |        |    | Prey capture technique | Nocturnality | Aquatic feeding |
|--------------------------------|-----------------------------|-------|----|----------------|-------|----|---------------|--------|----|------------------------|--------------|-----------------|
|                                | mean                        | s. e. | N  | mean           | s. e. | N  | mean          | s. e.  | N  |                        |              |                 |
| <i>Acanthis cannabina</i>      | 0.20                        |       | 1  | 0.67           | 0.025 | 11 | 18.78         | 0.444  | 11 | 1                      | 1            | 1               |
| <i>Acanthis flammea</i>        | 0.12                        |       | 1  | 0.60           | 0.033 | 3  | 12.13         | 0.372  | 3  | 1                      | 1            | 1               |
| <i>Accipiter gentilis</i>      |                             |       |    | 7.62           | 0.089 | 16 | 846.78        | 56.732 | 16 | 3                      | 1            | 1               |
| <i>Accipiter nisus</i>         | 3.01                        | 0.097 | 22 | 2.93           | 0.053 | 25 | 210.88        | 10.094 | 28 | 3                      | 1            | 1               |
| <i>Acrocephalus orientalis</i> | 0.53                        | 0.019 | 3  | 0.87           |       | 1  | 23.98         | 1.732  | 3  | 2                      | 1            | 1               |
| <i>Alauda arvensis</i>         | 0.60                        | 0.009 | 2  | 0.97           | 0.027 | 6  | 39.77         | 1.176  | 7  | 2                      | 1            | 1               |
| <i>Alcedo atthis</i>           | 0.74                        | 0.031 | 6  | 0.81           | 0.013 | 19 | 36.30         | 1.142  | 19 | 3                      | 1            | 3               |
| <i>Alisterus scapularis</i>    | 1.84                        | 0.012 | 6  | 4.56           | 0.282 | 7  | 203.11        | 11.540 | 7  | 1                      | 1            | 1               |
| <i>Alle alle</i>               | 1.38                        | 0.037 | 4  | 1.86           | 0.060 | 12 | 136.32        | 6.584  | 12 | 3                      | 1            | 3               |
| <i>Amazona aestiva</i>         | 2.54                        |       | 1  | 7.85           | 0.591 | 3  | 285.93        | 56.355 | 3  | 1                      | 1            | 1               |
| <i>Amazona amazonica</i>       | 3.06                        | 0.032 | 9  | 8.42           | 0.452 | 3  | 303.92        | 10.942 | 10 | 1                      | 1            | 1               |
| <i>Amazona finschi</i>         | 2.75                        |       | 1  | 7.92           | 0.198 | 4  | 298.00        | 36.725 | 4  | 1                      | 1            | 1               |
| <i>Amazona ochrocephala</i>    | 2.91                        | 0.074 | 3  | 8.01           | 0.812 | 3  | 295.83        | 70.487 | 3  | 1                      | 1            | 1               |
| <i>Anas platyrhynchos</i>      |                             |       |    | 5.82           | 0.230 | 7  | 1252.14       | 46.443 | 7  | 2                      | 1            | 3               |

|                                 |       |       |    |       |       |    |         |         |    |   |   |   |
|---------------------------------|-------|-------|----|-------|-------|----|---------|---------|----|---|---|---|
| <i>Andigena bailloni</i>        | 2.48  |       | 1  | 2.90  | 0.098 | 3  | 168.53  | 11.146  | 3  | 1 | 1 | 1 |
| <i>Anthus berthelotii</i>       | 0.37  | 0.019 | 4  | 0.52  | 0.038 | 4  | 15.99   | 0.285   | 4  | 2 | 1 | 1 |
| <i>Apus apus</i>                | 0.90  | 0.032 | 4  | 0.69  | 0.023 | 5  | 40.00   | 4.328   | 5  | 3 | 1 | 1 |
| <i>Ara ararauna</i>             |       |       |    | 13.37 | 3.085 | 4  | 530.48  | 155.545 | 4  | 1 | 1 | 1 |
| <i>Ara manilata</i>             | 1.95  | 0.022 | 2  | 8.36  | 0.480 | 2  | 270.75  | 20.750  | 2  | 1 | 1 | 1 |
| <i>Ardea cinerea</i>            |       |       |    | 7.91  | 0.163 | 6  | 1550.33 | 184.047 | 6  | 3 | 2 | 2 |
| <i>Asio flammeus</i>            |       |       |    | 5.45  | 0.563 | 4  | 349.88  | 53.798  | 4  | 3 | 2 | 1 |
| <i>Asio otus</i>                | 5.41  | 0.019 | 13 | 5.73  | 0.064 | 70 | 284.30  | 4.040   | 71 | 3 | 3 | 1 |
| <i>Bombycilla garrulus</i>      | 0.71  | 0.011 | 18 | 1.18  | 0.013 | 30 | 60.71   | 1.190   | 30 | 2 | 1 | 1 |
| <i>Bombycilla japonica</i>      | 0.65  | 0.016 | 2  | 1.10  | 0.069 | 5  | 47.48   | 6.101   | 5  | 2 | 1 | 1 |
| <i>Buteo buteo</i>              | 10.68 | 0.308 | 6  | 7.90  | 0.061 | 68 | 744.91  | 20.241  | 68 | 3 | 1 | 1 |
| <i>Buteo lagopus</i>            |       |       |    | 8.59  | 0.268 | 6  | 842.67  | 65.884  | 6  | 3 | 2 | 1 |
| <i>Calidris acuminata</i>       | 0.64  | 0.014 | 4  |       |       |    | 65.00   |         | 1  | 2 | 1 | 1 |
| <i>Calidris alpina</i>          | 0.45  | 0.017 | 5  | 0.86  | 0.014 | 6  | 35.83   | 1.111   | 6  | 2 | 1 | 1 |
| <i>Calidris maritima</i>        | 0.58  | 0.038 | 2  | 1.09  | 0.185 | 2  | 72.88   | 11.042  | 3  | 2 | 1 | 1 |
| <i>Calidris ruficollis</i>      | 0.31  | 0.016 | 9  |       |       |    | 29.00   | 0.949   | 5  | 2 | 1 | 1 |
| <i>Calidris subminuta</i>       | 0.33  | 0.041 | 2  |       |       |    | 24.62   | 0.255   | 2  | 2 | 1 | 1 |
| <i>Caprimulgus europaeus</i>    | 1.71  |       | 1  | 0.74  | 0.063 | 3  | 72.94   | 5.193   | 3  | 3 | 2 | 1 |
| <i>Carduelis ambigua</i>        | 0.24  | 0.022 | 2  | 0.66  | 0.040 | 2  | 14.10   | 0.600   | 2  | 1 | 1 | 1 |
| <i>Carduelis carduelis</i>      | 0.16  | 0.018 | 3  | 0.59  | 0.021 | 21 | 15.00   | 0.475   | 21 | 1 | 1 | 1 |
| <i>Carduelis chloris</i>        | 0.27  | 0.007 | 10 | 0.89  | 0.016 | 41 | 26.50   | 0.394   | 43 | 1 | 1 | 1 |
| <i>Carduelis spinus</i>         | 0.14  | 0.014 | 6  | 0.56  | 0.023 | 11 | 12.08   | 0.447   | 12 | 1 | 1 | 1 |
| <i>Carpodacus roseus</i>        | 0.39  | 0.049 | 2  | 1.01  | 0.020 | 3  | 21.15   | 0.797   | 3  | 1 | 1 | 1 |
| <i>Certhia familiaris</i>       | 0.12  | 0.006 | 2  | 0.55  | 0.033 | 5  | 8.42    | 0.174   | 5  | 2 | 1 | 1 |
| <i>Chalcophaps indiacca</i>     | 0.89  | 0.091 | 2  | 0.70  |       | 1  | 72.30   | 14.700  | 2  | 1 | 1 | 1 |
| <i>Charadrius leschenaultii</i> | 1.91  | 0.025 | 5  | 1.24  | 0.035 | 2  | 75.96   | 2.119   | 4  | 2 | 1 | 1 |
| <i>Cinclodes fuscus</i>         | 0.59  | 0.019 | 2  | 0.93  | 0.020 | 2  | 30.45   | 2.650   | 2  | 2 | 1 | 1 |
| <i>Cinclus cinclus</i>          | 0.55  | 0.009 | 2  | 1.25  | 0.167 | 3  | 61.36   | 5.443   | 3  | 3 | 1 | 2 |
| <i>Circus aeruginosus</i>       |       |       |    | 5.97  | 0.139 | 3  | 617.00  | 65.919  | 3  | 3 | 1 | 1 |
| <i>Cissa chinensis</i>          | 2.08  | 0.019 | 2  | 4.33  | 0.125 | 2  | 106.50  | 9.500   | 2  | 2 | 1 | 1 |
| <i>Clangula hyemalis</i>        |       |       |    | 4.66  | 0.173 | 11 | 759.03  | 25.712  | 11 | 2 | 1 | 3 |
| <i>Columba palumbus</i>         | 2.09  |       | 1  | 2.38  | 0.078 | 3  | 486.83  | 37.076  | 3  | 1 | 1 | 1 |

|                                 |      |       |    |       |       |    |         |         |    |   |   |   |
|---------------------------------|------|-------|----|-------|-------|----|---------|---------|----|---|---|---|
| <i>Columbina cruziana</i>       | 0.43 |       | 1  | 0.53  | 0.010 | 2  | 46.05   | 3.650   | 2  | 1 | 1 | 1 |
| <i>Corvus corax</i>             |      |       |    | 15.31 | 0.790 | 2  | 1405.00 | 55.000  | 2  | 2 | 1 | 1 |
| <i>Corvus cornix</i>            |      |       |    | 8.85  | 0.125 | 42 | 517.90  | 11.043  | 42 | 2 | 1 | 1 |
| <i>Corvus corone</i>            |      |       |    | 7.36  | 0.120 | 2  | 523.95  | 14.550  | 2  | 2 | 1 | 1 |
| <i>Corvus frugilegus</i>        |      |       |    | 8.13  | 0.402 | 4  | 509.30  | 41.432  | 4  | 2 | 1 | 1 |
| <i>Corvus monedula</i>          | 1.87 | 0.034 | 2  | 4.69  | 0.161 | 11 | 211.29  | 13.111  | 11 | 2 | 1 | 1 |
| <i>Corythornis cristata</i>     | 0.39 |       | 1  | 0.34  | 0.027 | 3  | 10.90   | 1.222   | 3  | 3 | 1 | 3 |
| <i>Crex crex</i>                | 0.80 |       | 1  | 1.29  | 0.038 | 3  | 184.77  | 26.869  | 3  | 2 | 1 | 1 |
| <i>Cuculus canorus</i>          | 1.95 |       | 1  | 2.24  | 0.709 | 9  | 104.22  | 5.252   | 9  | 2 | 1 | 1 |
| <i>Emberiza citrinella</i>      | 0.37 | 0.013 | 11 | 0.82  | 0.015 | 36 | 28.58   | 0.389   | 36 | 1 | 1 | 1 |
| <i>Emberiza rutila</i>          | 0.26 | 0.003 | 2  | 0.59  | 0.065 | 3  | 17.18   | 0.815   | 3  | 1 | 1 | 1 |
| <i>Emberiza schoeniclus</i>     | 0.28 |       | 1  | 0.68  | 0.047 | 3  | 20.57   | 0.467   | 3  | 1 | 1 | 1 |
| <i>Eremophila biloba</i>        | 0.41 |       | 1  | 0.85  | 0.080 | 2  | 23.55   | 0.850   | 2  | 1 | 1 | 1 |
| <i>Erithacus rubecula</i>       | 0.50 | 0.015 | 12 | 0.66  | 0.017 | 29 | 16.75   | 0.387   | 31 | 2 | 1 | 1 |
| <i>Falco tinnunculus</i>        | 3.54 | 0.035 | 5  | 3.68  | 0.050 | 30 | 186.95  | 6.055   | 30 | 3 | 2 | 1 |
| <i>Ficedula hypoleuca</i>       | 0.33 |       | 1  | 0.45  | 0.017 | 5  | 12.76   | 0.984   | 5  | 3 | 1 | 1 |
| <i>Fratercula arctica</i>       |      |       |    | 4.05  | 0.150 | 2  | 352.00  | 33.500  | 2  | 3 | 1 | 3 |
| <i>Fringilla coelebs</i>        | 0.34 | 0.012 | 15 | 0.77  | 0.012 | 59 | 24.26   | 0.301   | 62 | 1 | 1 | 1 |
| <i>Fringilla montifringilla</i> | 0.30 | 0.011 | 4  | 0.78  | 0.016 | 15 | 24.94   | 0.740   | 15 | 1 | 1 | 1 |
| <i>Fulica atra</i>              |      |       |    | 3.21  | 0.134 | 4  | 518.33  | 60.601  | 4  | 2 | 1 | 2 |
| <i>Furnarius rufus</i>          | 1.00 | 0.047 | 3  | 1.35  | 0.029 | 3  | 63.70   | 0.693   | 3  | 2 | 1 | 1 |
| <i>Galerida cristata</i>        | 0.58 | 0.031 | 2  | 1.08  | 0.060 | 3  | 42.13   | 0.416   | 3  | 2 | 1 | 1 |
| <i>Gallixrex cinerea</i>        | 1.73 | 0.013 | 2  |       |       |    | 367.50  | 75.500  | 2  | 2 | 2 | 2 |
| <i>Gallinago gallinago</i>      | 0.80 | 0.068 | 3  | 1.35  | 0.045 | 14 | 107.56  | 5.014   | 15 | 2 | 2 | 1 |
| <i>Gallinula chloropus</i>      | 1.15 |       | 1  | 2.05  | 0.050 | 7  | 324.03  | 28.452  | 7  | 2 | 1 | 2 |
| <i>Gallus sonneratii</i>        | 2.88 |       | 1  | 3.33  | 0.313 | 3  | 717.00  | 205.768 | 3  | 1 | 1 | 1 |
| <i>Garrulus glandarius</i>      | 2.36 | 0.055 | 3  | 4.15  | 0.113 | 46 | 168.89  | 2.497   | 46 | 1 | 1 | 1 |
| <i>Halcyon chloris</i>          | 1.23 | 0.047 | 2  |       |       |    | 56.00   | 1.000   | 2  | 3 | 1 | 3 |
| <i>Hippolais icterina</i>       | 0.29 | 0.020 | 3  | 0.54  | 0.024 | 7  | 12.74   | 0.525   | 7  | 2 | 1 | 1 |
| <i>Hirundo rustica</i>          | 0.36 | 0.013 | 16 | 0.58  | 0.019 | 27 | 17.54   | 0.426   | 29 | 3 | 1 | 1 |
| <i>Irena puella</i>             | 0.99 | 0.016 | 2  | 1.12  | 0.027 | 3  | 58.37   | 5.905   | 3  | 1 | 1 | 1 |
| <i>Jynx torquilla</i>           | 0.52 | 0.019 | 3  | 0.85  | 0.028 | 9  | 36.69   | 1.253   | 9  | 2 | 1 | 1 |

|                                |      |       |    |       |       |    |         |         |    |   |   |   |
|--------------------------------|------|-------|----|-------|-------|----|---------|---------|----|---|---|---|
| <i>Lagopus lagopus</i>         | 2.56 |       | 1  | 2.45  | 0.112 | 6  | 542.12  | 24.501  | 6  | 1 | 1 | 1 |
| <i>Lagopus mutus</i>           | 2.26 | 0.028 | 2  | 2.46  | 0.280 | 2  | 519.33  | 16.455  | 3  | 1 | 1 | 1 |
| <i>Lanius collurio</i>         | 0.81 | 0.019 | 2  | 1.00  | 0.082 | 3  | 28.47   | 0.133   | 3  | 3 | 1 | 1 |
| <i>Lanius excubitor</i>        | 1.33 |       | 1  | 1.48  | 0.100 | 2  | 59.63   | 4.425   | 2  | 3 | 1 | 1 |
| <i>Larus canus</i>             | 4.47 | 0.039 | 4  | 3.80  | 0.140 | 8  | 360.05  | 21.109  | 8  | 3 | 1 | 1 |
| <i>Larus ridibundus</i>        | 2.34 | 0.055 | 2  | 2.88  | 0.074 | 12 | 256.18  | 12.417  | 12 | 3 | 1 | 1 |
| <i>Lessonia rufa</i>           | 0.30 | 0.012 | 4  | 0.44  | 0.031 | 3  | 14.48   | 0.382   | 4  | 3 | 1 | 1 |
| <i>Lonchura bicolor</i>        | 0.14 |       | 1  | 0.44  | 0.025 | 2  | 9.69    | 0.015   | 2  | 1 | 1 | 1 |
| <i>Lonchura flaviprymna</i>    | 0.14 |       | 1  | 0.43  | 0.025 | 2  | 11.68   | 0.975   | 2  | 1 | 1 | 1 |
| <i>Lonchura molucca</i>        | 0.10 | 0.016 | 2  | 0.40  | 0.025 | 2  | 10.25   | 0.305   | 2  | 1 | 1 | 1 |
| <i>Lophortyx gambelii</i>      | 0.91 | 0.041 | 2  | 1.16  | 0.125 | 2  | 162.25  | 5.750   | 2  | 1 | 1 | 1 |
| <i>Megalaima asiatica</i>      | 1.21 | 0.016 | 2  | 1.64  | 0.140 | 2  | 98.90   | 14.700  | 2  | 1 | 1 | 1 |
| <i>Mergus merganser</i>        |      |       |    | 6.95  | 0.349 | 5  | 1448.00 | 131.354 | 5  | 3 | 1 | 3 |
| <i>Mergus serrator</i>         |      |       |    | 5.50  | 0.119 | 3  | 1092.00 | 200.642 | 3  | 3 | 1 | 3 |
| <i>Motacilla alba</i>          | 0.31 | 0.017 | 9  | 0.58  | 0.024 | 15 | 18.96   | 0.672   | 15 | 2 | 1 | 1 |
| <i>Nectarinia venusta</i>      | 0.11 |       | 1  | 0.31  | 0.009 | 9  | 4.96    | 0.197   | 9  | 1 | 1 | 1 |
| <i>Nucifraga caryocatactes</i> |      |       |    | 5.71  | 0.175 | 3  | 189.47  | 7.541   | 3  | 1 | 1 | 1 |
| <i>Oenanthe oenanthe</i>       | 0.61 |       | 1  | 0.72  | 0.021 | 7  | 25.09   | 1.320   | 8  | 2 | 1 | 1 |
| <i>Panurus biarmicus</i>       | 0.15 | 0.013 | 2  | 0.57  | 0.020 | 6  | 13.94   | 0.858   | 7  | 2 | 1 | 1 |
| <i>Parus ater</i>              | 0.12 | 0.044 | 2  | 0.51  | 0.040 | 2  | 8.00    | 0.436   | 3  | 2 | 1 | 1 |
| <i>Parus caeruleus</i>         | 0.18 | 0.020 | 4  | 0.65  | 0.030 | 12 | 10.79   | 0.255   | 13 | 2 | 1 | 1 |
| <i>Parus cyanus</i>            | 0.24 | 0.031 | 2  | 0.66  | 0.005 | 2  | 9.95    | 0.950   | 2  | 2 | 1 | 1 |
| <i>Parus major</i>             | 0.31 | 0.014 | 9  | 0.85  | 0.021 | 24 | 17.02   | 0.346   | 26 | 2 | 1 | 1 |
| <i>Parus venustulus</i>        | 0.18 |       | 1  | 0.53  | 0.015 | 2  | 10.54   | 0.105   | 2  | 2 | 1 | 1 |
| <i>Passer domesticus</i>       | 0.34 | 0.017 | 22 | 0.92  | 0.013 | 51 | 28.49   | 0.351   | 50 | 1 | 1 | 1 |
| <i>Passer hispaniolensis</i>   | 0.25 | 0.013 | 3  | 0.93  | 0.020 | 3  | 27.13   | 2.697   | 3  | 1 | 1 | 1 |
| <i>Passer montanus</i>         | 0.25 | 0.011 | 12 | 0.79  | 0.017 | 27 | 21.38   | 0.403   | 28 | 1 | 1 | 1 |
| <i>Passer rutilans</i>         | 0.26 |       | 1  | 0.68  | 0.030 | 2  | 18.35   | 2.510   | 2  | 1 | 1 | 1 |
| <i>Perdix perdix</i>           | 1.39 |       | 1  | 1.89  | 0.028 | 17 | 392.48  | 10.379  | 17 | 1 | 1 | 1 |
| <i>Phalacrocorax carbo</i>     |      |       |    | 11.06 | 0.237 | 6  | 2013.33 | 153.094 | 6  | 3 | 1 | 3 |
| <i>Phasianus colchicus</i>     |      |       |    | 4.12  | 0.059 | 29 | 1438.69 | 33.356  | 29 | 2 | 1 | 1 |
| <i>Phoenicurus phoenicurus</i> | 0.35 | 0.017 | 6  | 0.54  | 0.033 | 13 | 15.78   | 1.076   | 13 | 2 | 1 | 1 |

|                                |       |       |    |      |       |    |         |        |    |   |   |   |
|--------------------------------|-------|-------|----|------|-------|----|---------|--------|----|---|---|---|
| <i>Phylloscopus collybita</i>  | 0.17  | 0.014 | 6  | 0.38 | 0.019 | 11 | 8.02    | 0.223  | 11 | 2 | 1 | 1 |
| <i>Phylloscopus trochilus</i>  | 0.16  |       | 1  | 0.31 | 0.028 | 6  | 9.92    | 0.596  | 6  | 2 | 1 | 1 |
| <i>Pica pica</i>               | 2.47  | 0.031 | 4  | 5.34 | 0.143 | 30 | 206.13  | 5.390  | 30 | 2 | 1 | 1 |
| <i>Picoides major</i>          | 1.04  | 0.018 | 10 | 2.59 | 0.059 | 28 | 77.18   | 1.288  | 32 | 2 | 1 | 1 |
| <i>Picus viridis</i>           | 1.81  | 0.028 | 3  | 4.35 | 0.136 | 7  | 182.26  | 5.576  | 7  | 2 | 1 | 1 |
| <i>Pitangus sulphuratus</i>    | 1.41  | 0.064 | 3  | 1.32 | 0.134 | 3  | 70.20   | 7.766  | 3  | 3 | 1 | 1 |
| <i>Pitta erythrogaster</i>     |       |       |    | 0.95 | 0.250 | 2  | 48.35   | 1.350  | 2  | 2 | 1 | 1 |
| <i>Pitta guajana</i>           | 1.91  | 0.026 | 4  | 1.42 | 0.069 | 5  | 69.51   | 6.765  | 5  | 2 | 1 | 1 |
| <i>Pitta sordida</i>           | 1.51  | 0.035 | 3  | 1.25 | 0.032 | 5  | 51.51   | 5.883  | 4  | 2 | 1 | 1 |
| <i>Platycercus caledonicus</i> | 1.11  | 0.025 | 5  | 3.25 | 0.132 | 4  | 94.56   | 7.468  | 5  | 1 | 1 | 1 |
| <i>Platysteira cyanea</i>      | 0.46  | 0.015 | 8  | 0.60 | 0.005 | 2  | 11.84   | 0.499  | 8  | 2 | 1 | 1 |
| <i>Pluvialis apricaria</i>     | 3.18  |       | 1  | 2.09 | 0.064 | 15 | 193.51  | 8.733  | 15 | 2 | 1 | 1 |
| <i>Pluvialis dominica</i>      | 2.38  | 0.019 | 2  |      |       |    | 118.00  |        | 1  | 2 | 1 | 1 |
| <i>Pluvialis squatarola</i>    | 3.35  |       | 1  | 2.23 | 0.056 | 8  | 205.38  | 14.606 | 8  | 2 | 1 | 1 |
| <i>Podiceps cristatus</i>      |       |       |    | 3.55 | 0.159 | 7  | 941.23  | 33.126 | 7  | 3 | 1 | 3 |
| <i>Poicephalus meyeri</i>      | 1.17  |       | 1  | 4.00 | 0.204 | 4  | 92.95   | 9.175  | 4  | 1 | 1 | 1 |
| <i>Polioptila dumicola</i>     | 0.21  | 0.025 | 2  | 0.43 |       | 1  | 7.60    | 0.500  | 2  | 2 | 1 | 1 |
| <i>Prunella modularis</i>      | 0.36  | 0.019 | 6  | 0.71 | 0.028 | 14 | 20.41   | 0.411  | 14 | 2 | 1 | 1 |
| <i>Psilopogon pyrolophus</i>   | 1.76  |       | 1  | 2.14 | 0.078 | 8  | 113.00  | 7.130  | 8  | 1 | 1 | 1 |
| <i>Pteroglossus aracari</i>    | 3.90  | 0.032 | 3  | 3.45 | 0.087 | 3  | 267.17  | 5.674  | 3  | 1 | 1 | 1 |
| <i>Pyrenestes sanguineus</i>   | 0.38  | 0.022 | 3  | 0.97 | 0.005 | 2  | 14.27   | 0.897  | 3  | 1 | 1 | 1 |
| <i>Rallus aquaticus</i>        | 0.76  | 0.050 | 2  | 1.62 | 0.043 | 7  | 121.83  | 5.000  | 6  | 2 | 1 | 2 |
| <i>Regulus regulus</i>         | 0.15  | 0.012 | 5  | 0.38 | 0.010 | 34 | 5.70    | 0.113  | 34 | 2 | 1 | 1 |
| <i>Rostratula benghalensis</i> | 1.59  |       | 1  |      |       |    | 178.00  |        | 1  | 2 | 2 | 2 |
| <i>Saxicola decotiae</i>       | 0.41  |       | 1  |      |       |    | 16.47   | 0.045  | 2  | 2 | 1 | 1 |
| <i>Scolopax rusticola</i>      | 3.11  | 0.022 | 2  | 2.47 | 0.055 | 20 | 315.60  | 7.612  | 21 | 2 | 2 | 1 |
| <i>Serinus burtoni</i>         | 0.38  | 0.017 | 2  | 1.21 | 0.040 | 2  | 29.60   | 3.800  | 2  | 1 | 1 | 1 |
| <i>Sitta europaea</i>          |       |       |    | 1.11 | 0.024 | 7  | 23.03   | 0.473  | 7  | 2 | 1 | 1 |
| <i>Somateria mollissima</i>    |       |       |    | 7.92 | 0.188 | 13 | 2233.08 | 88.552 | 13 | 2 | 1 | 3 |
| <i>Spermophaga haematina</i>   | 0.39  | 0.017 | 3  | 0.91 |       | 1  | 16.87   | 0.728  | 3  | 1 | 1 | 1 |
| <i>Streptopelia decaocto</i>   | 1.26  |       | 1  | 1.56 | 0.061 | 3  | 175.53  | 25.093 | 3  | 1 | 1 | 1 |
| <i>Strix aluco</i>             | 14.07 | 0.172 | 2  | 9.36 | 0.176 | 37 | 460.88  | 12.957 | 37 | 3 | 3 | 1 |

|                                 |      |       |    |      |       |    |         |         |    |   |   |   |
|---------------------------------|------|-------|----|------|-------|----|---------|---------|----|---|---|---|
| <i>Sturnus vulgaris</i>         | 0.53 | 0.040 | 4  | 2.24 | 0.536 | 14 | 109.40  | 36.271  | 14 | 2 | 1 | 1 |
| <i>Sylvia atricapilla</i>       | 0.35 | 0.012 | 9  | 0.67 | 0.019 | 15 | 19.37   | 0.852   | 14 | 2 | 1 | 1 |
| <i>Sylvia borin</i>             | 0.35 | 0.028 | 2  | 0.62 | 0.023 | 12 | 18.22   | 0.587   | 12 | 2 | 1 | 1 |
| <i>Sylvia communis</i>          | 0.27 | 0.015 | 3  | 0.56 | 0.033 | 11 | 14.09   | 0.412   | 11 | 2 | 1 | 1 |
| <i>Sylvia curruca</i>           | 0.24 | 0.010 | 3  | 0.53 | 0.026 | 10 | 12.82   | 0.508   | 10 | 2 | 1 | 1 |
| <i>Sylvia hortensis</i>         | 0.40 | 0.059 | 2  | 0.79 | 0.110 | 2  | 22.25   | 1.350   | 2  | 2 | 1 | 1 |
| <i>Sylvia melanocephala</i>     | 0.25 | 0.008 | 5  | 0.53 | 0.020 | 6  | 10.98   | 0.364   | 6  | 2 | 1 | 1 |
| <i>Tachybaptus ruficollis</i>   |      |       |    | 1.62 | 0.105 | 3  | 138.40  | 5.454   | 3  | 3 | 1 | 3 |
| <i>Tetrao urogallis</i>         |      |       |    | 5.46 | 0.260 | 4  | 3412.50 | 760.585 | 4  | 1 | 1 | 1 |
| <i>Thraupis palmarum</i>        | 0.51 | 0.016 | 2  | 0.98 | 0.033 | 5  | 34.49   | 0.862   | 5  | 1 | 1 | 1 |
| <i>Trichoglossus haematodus</i> | 0.92 | 0.018 | 3  | 3.51 | 0.120 | 7  | 114.41  | 6.187   | 7  | 1 | 1 | 1 |
| <i>Tringa nebularia</i>         | 1.63 | 0.037 | 3  | 1.62 | 0.047 | 14 | 152.52  | 3.647   | 13 | 2 | 1 | 2 |
| <i>Tringa robusta</i>           | 1.17 | 0.016 | 2  | 1.60 | 0.220 | 2  | 114.75  | 24.450  | 2  | 2 | 2 | 1 |
| <i>Tringa totanus</i>           |      |       |    | 1.39 | 0.054 | 12 | 104.25  | 4.438   | 12 | 2 | 2 | 1 |
| <i>Troglodytes aedon</i>        | 0.29 |       | 1  | 0.53 | 0.075 | 2  | 12.15   | 0.050   | 2  | 2 | 1 | 1 |
| <i>Troglodytes troglodytes</i>  | 0.20 | 0.020 | 5  | 0.51 | 0.019 | 19 | 9.27    | 0.344   | 19 | 2 | 1 | 1 |
| <i>Turdus merula</i>            | 1.16 | 0.012 | 13 | 1.92 | 0.029 | 55 | 98.17   | 1.716   | 55 | 2 | 1 | 1 |
| <i>Turdus philomelos</i>        | 1.12 | 0.018 | 11 | 1.59 | 0.022 | 54 | 69.64   | 1.164   | 55 | 2 | 1 | 1 |
| <i>Turdus pilaris</i>           | 1.25 | 0.008 | 3  | 1.85 | 0.029 | 10 | 102.20  | 3.544   | 10 | 2 | 1 | 1 |
| <i>Tyto alba</i>                | 3.84 | 0.042 | 5  | 5.83 | 0.130 | 19 | 277.51  | 8.404   | 19 | 3 | 3 | 1 |
| <i>Tyto guttata</i>             | 3.85 | 0.031 | 3  | 5.97 | 0.397 | 3  | 263.50  | 11.730  | 3  | 3 | 3 | 1 |
| <i>Upupa epops</i>              | 0.69 | 0.028 | 3  | 1.27 | 0.054 | 4  | 38.84   | 2.057   | 4  | 2 | 1 | 1 |
| <i>Uria aalge</i>               | 3.96 |       | 1  | 4.64 | 0.136 | 5  | 802.50  | 128.965 | 5  | 3 | 1 | 3 |
| <i>Vanellus vanellus</i>        | 2.58 | 0.022 | 4  | 2.16 | 0.054 | 13 | 216.25  | 10.537  | 12 | 2 | 1 | 1 |
| <i>Zonotrichia capensis</i>     | 0.42 | 0.050 | 2  | 0.80 | 0.075 | 2  | 20.30   | 2.380   | 3  | 1 | 1 | 1 |

---
